# Supplementary material
Source: PubMed Central journal article supplement (PMC3143647)
Supplement: supp_M111.238287_jbc.M111.238287-1.pdf [file supp_M111.238287_jbc.M111.238287-1.pdf]

## Supplemental Information

### **Figure S1**

#### **Regulation SOCS1 expression in BCG-infected BMM, related to Figure 1**

Total RNA was isolated from WT BMM treated or not with 5  $\mu$ M cytochalasin D, 6 h after incubation with BCG (MOI 5:1) or 1  $\mu$ g/ml Pam3 (A).

The accumulation of *SOCS1* and *HPRT* mRNA were measured by real time PCR in triplicate samples for each group and time point. The mean fold induction of *SOCS1* mRNA  $\pm$  SEM is depicted.

Total RNA was isolated from BMM treated with the indicated concentrations of BAY-11 7082 or vehicle alone (B) 1h before BCG infection. The accumulation of *MCP-1* and *HPRT* mRNA was measured by real time PCR. The mean fold induction of *MCP-1* mRNA  $\pm$  SEM is depicted.

\*Differences with WT controls are significant ( $p < 0.05$  Student t test)

### **Figure S.2**

#### **SOCS1 expression *LysM-cre SOCS1<sup>fl/fl</sup> M. tuberculosis*-infected BMM, related to Figure 2**

The relative concentration of *SOCS1* and *HPRT* mRNA were measured from total RNA isolated from *LysM-cre SOCS1<sup>fl/fl</sup>* and *SOCS1<sup>fl/fl</sup>* BMM at the indicated time points after infection with *M. tuberculosis* by real time PCR. The mean fold induction of *SOCS1* mRNA  $\pm$  SEM is depicted (A).

#### **SOCS1 hinders clearance of BCG by macrophages in an IFN- $\gamma$ -mediated manner, related to Figure 3**

Total RNA was extracted from *SOCS1<sup>-/-</sup>* and WT BMM (B-D) and BMDC (E-G) at the indicated time points after infection with BCG at a MOI 5:1. The accumulation of *IFN- $\alpha$* , *IFN- $\beta$*  and *IFN- $\gamma$*  and *HPRT* mRNA was measured by real time PCR. The mean fold accumulation of the transcripts of triplicate cultures per time point in relation to *HPRT*  $\pm$  standard error of the mean is depicted.

IFN- $\gamma$ -secreting *SOCS1<sup>-/-</sup>* and WT BMDC were measured by ELISPOT assay 24 h after incubation with BCG or with culture medium as a control. The mean number of spots  $\pm$  SEM from triplicate cultures in each experimental condition is shown (H).

IFN- $\gamma<sup>-/-</sup>$  and IFN- $\gamma<sup>-/-</sup>$ /*SOCS1<sup>-/-</sup>* BMM were infected with BCG at MOI 5:1 (I), and the CFU were determined in lysates from triplicate cultures. The mean CFU per well  $\pm$  SEM from one of two independent experiments is depicted.

Total RNA was isolated from *IFN- $\gamma$  R<sup>-/-</sup>* and WT BMM at different time points after infection with BCG at a MOI 5: 1 (J). The accumulation of *SOCS1* and *HPRT* mRNA was measured by real time PCR.

\*Differences with control BMM are significant ( $p < 0.05$  Student t-test).

### Figure S.3

***SOCS1-dependent expression of IL12Rβ1 mRNA by M. tuberculosis infected BMM is IFN-γ-dependent, related to Figure 4.***

Total RNA was isolated from IFN-γ<sup>-/-</sup> and IFN-γ<sup>-/-</sup>/SOCS1<sup>-/-</sup> BMM at the indicated times after infection with *M. tuberculosis*. The accumulation of *IL12Rβ1* and *HPRT* mRNA were measured by real time PCR in triplicate samples for each group and time point. The mean fold induction of *IL12Rβ1* mRNA ± SEM is depicted (A).

***M. tuberculosis-infected BMM are not tolerant to IFN-γ (B, C), related to Figure 4***

SOCS1<sup>-/-</sup> and WT BMM were treated with 100 U IFN-γ 3 h after infection with *M. tuberculosis*. Total RNA was isolated at the indicated time points after infection. Uninfected controls were harvested 3 h after IFN-γ stimulation. The accumulation of *CXCL10* (B), *iNOS* (C) and *HPRT* mRNA was measured by real time PCR. The mean fold accumulation of *CXCL10* mRNA of triplicate cultures per time point in relation to *HPRT* ± standard error of the mean is depicted. Differences between IFN-γ-treated and untreated cells are significant (p<0.05 Student t test).

### Figure S.4

***SOCS1 in non-macrophage cells hinders detrimental pulmonary inflammation, related to Figure 7***

Total RNA was extracted from lungs of individual *RAG1*<sup>-/-</sup>, *RAG1*<sup>-/-</sup>/*SOCS1*<sup>-/-</sup>, IFN-γR<sup>-/-</sup>, IFN-γ<sup>-/-</sup>, IFN-γ<sup>-/-</sup>/*SOCS1*<sup>-/-</sup> and C57Bl/6 mice after aerosol infection with *M. tuberculosis*. The mean fold accumulation of *SOCS1* (D, E), *IFN-γ* (B), *iNOS* (A, F), *CXCL9* (G) and *CXCL10* (H) transcripts ± SEM is depicted.

\*Differences with mutant uninfected controls are significant (p<0.05 Student t test).

Spleens and lung cells were obtained from *LysM-cre SOCS1*<sup>fl/fl</sup> and *SOCS1*<sup>fl/fl</sup> mice before or at 6 weeks after aerosol infection with *M. tuberculosis*. The frequency of IFN-γ secreting CD4<sup>+</sup> cells in response to PPD stimulation was assessed by FACS analysis as described in the supplementary experimental procedures section. The mean frequency of IFN-γ-secreting CD4<sup>+</sup> cells of at least 4 animals per group ± SEM is depicted (C). IFN-γ-secreting cells were not detected in uninfected mice.

Histopathological scoring of hematoxylin-eosin stained paraffin lung sections from *LysM-cre SOCS1*<sup>fl/fl</sup> and *SOCS1*<sup>fl/fl</sup> 6 weeks after aerosol infection with *M. tuberculosis*. The mean % area or the relative histopathological score of 8 mice per group ± SEM is depicted (I-J). \*Differences with controls are significant (p<0.05 Student t test).

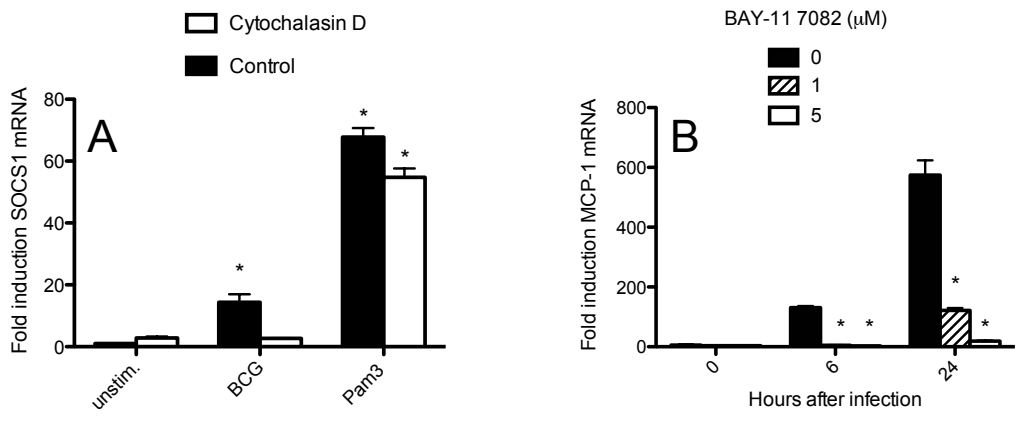

**Figure S1**

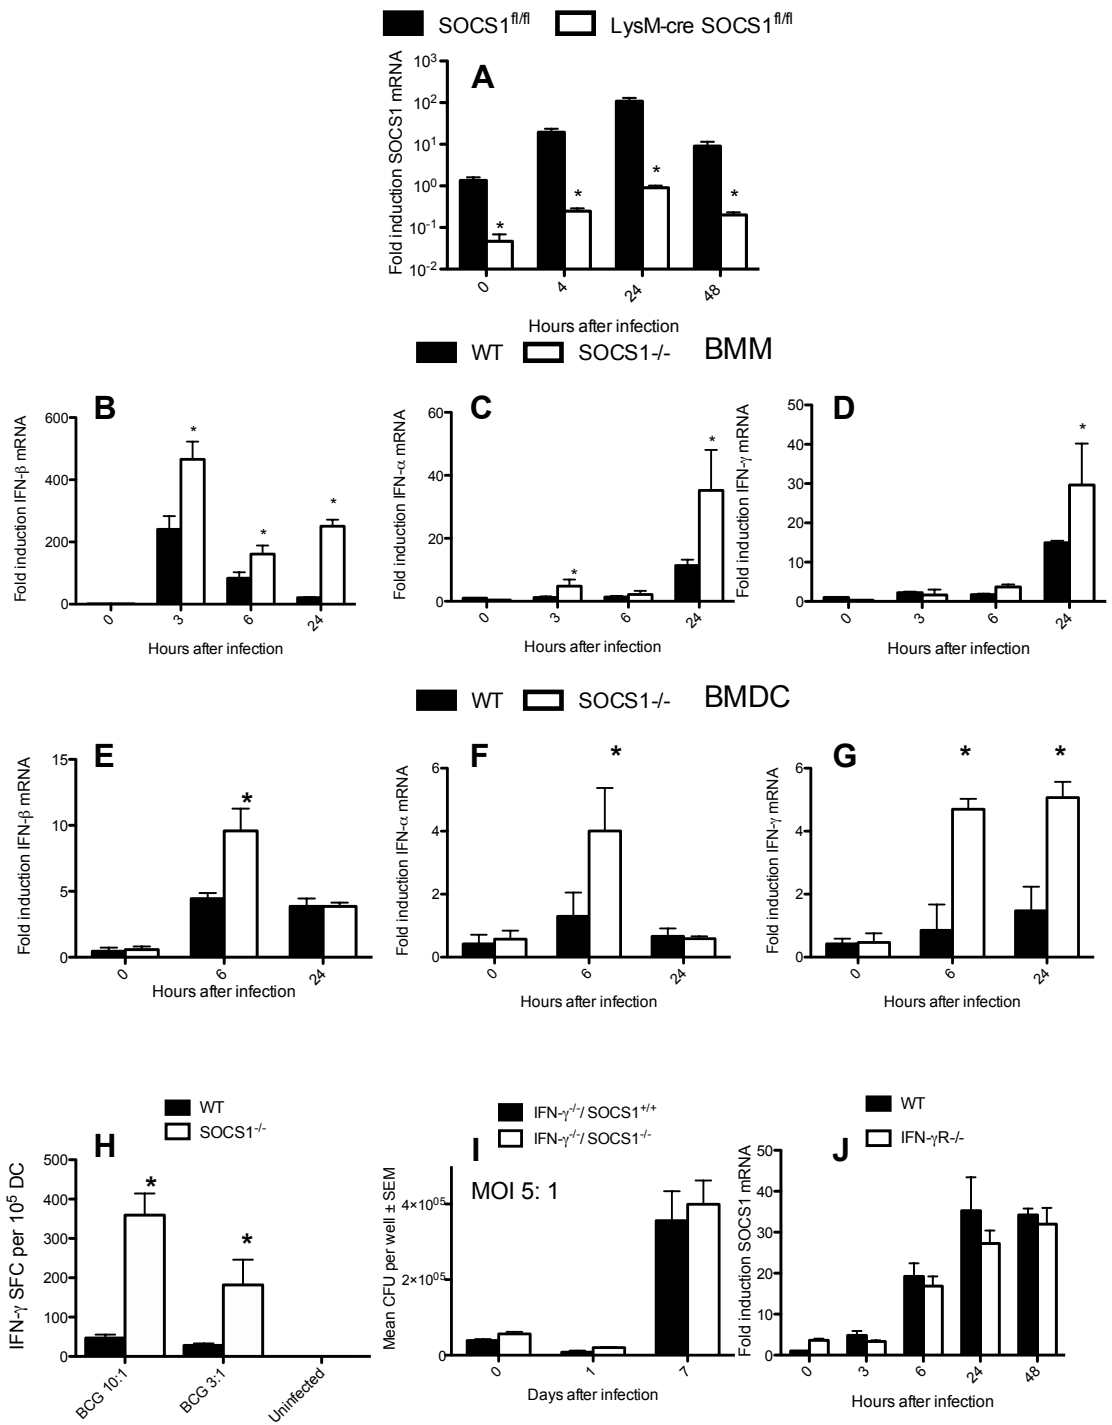

Figure S2

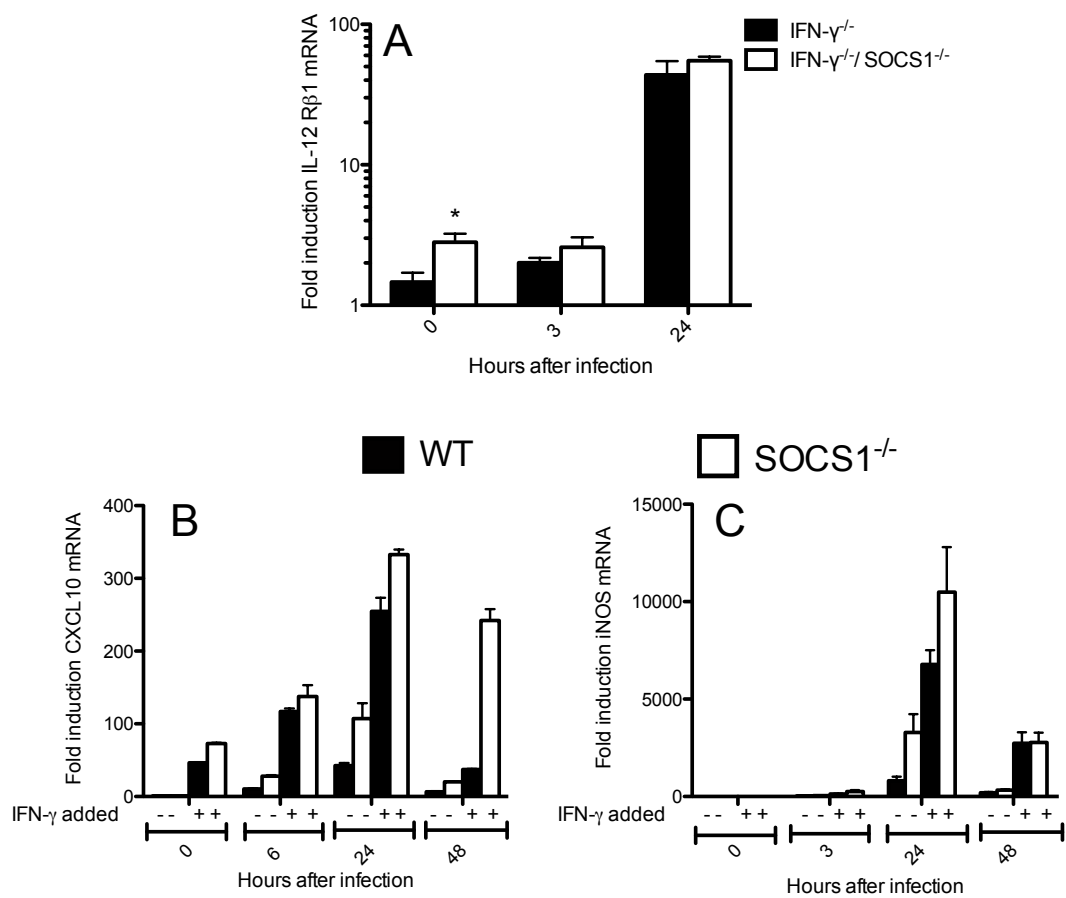

Figure S3

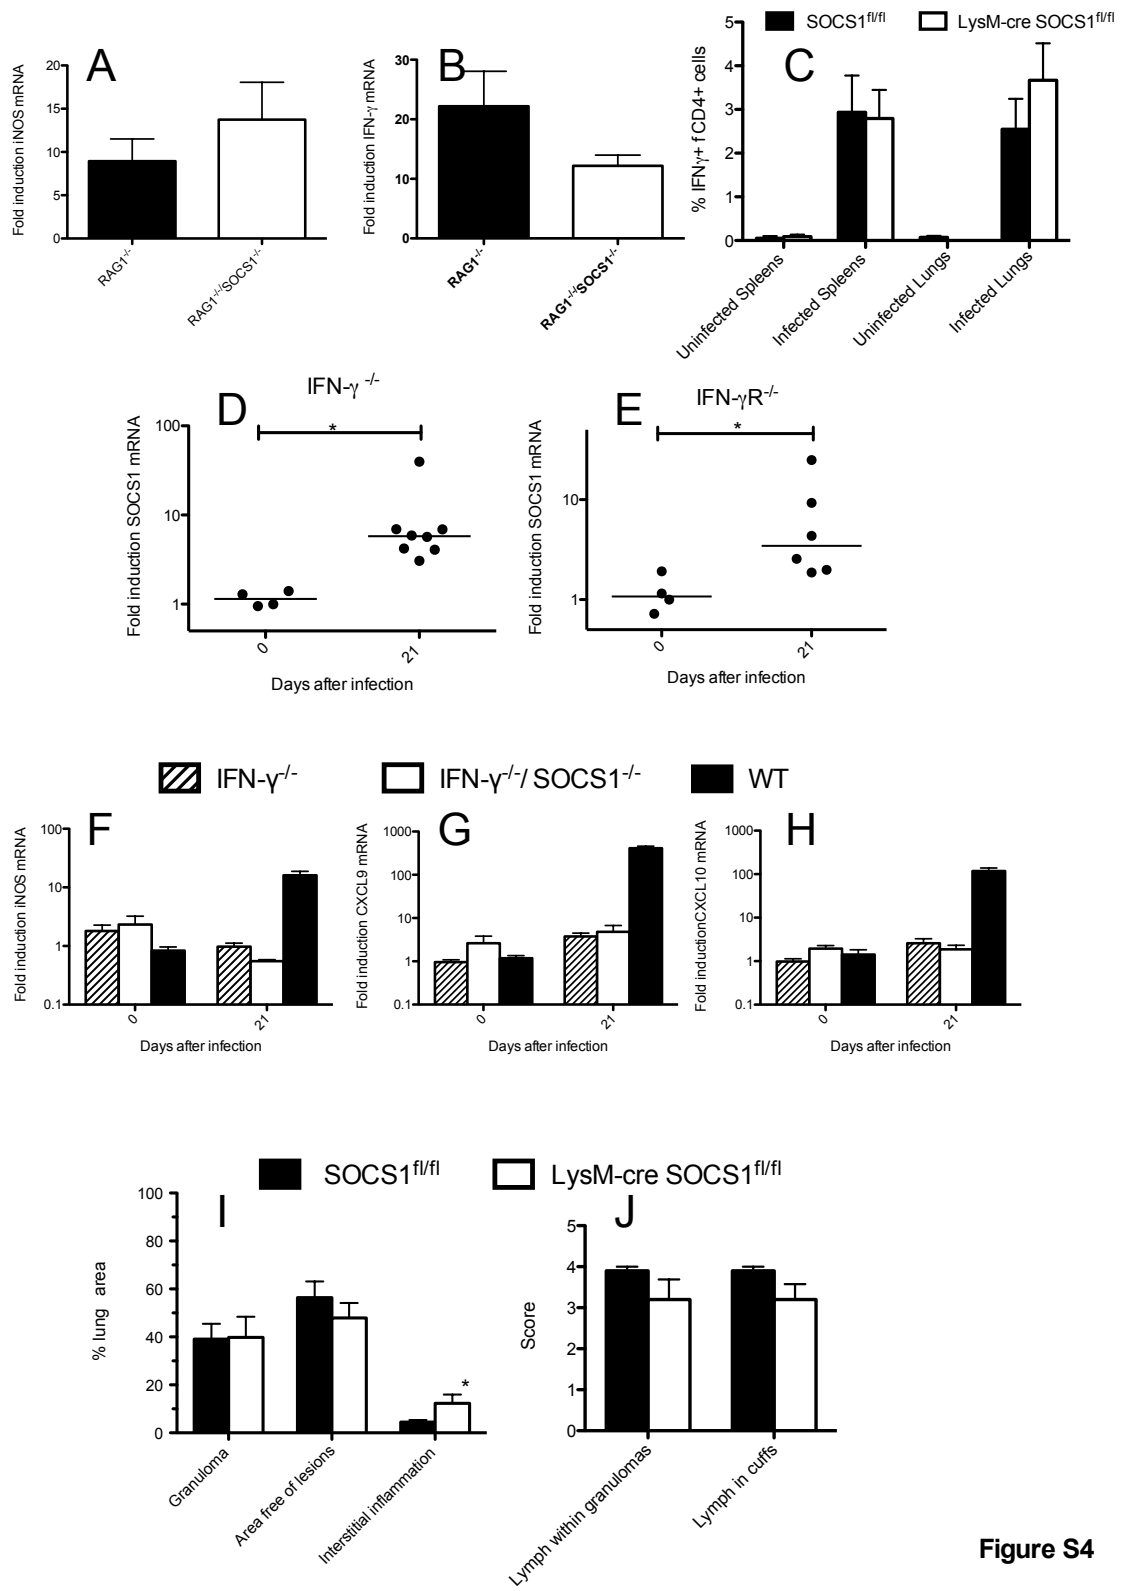

Figure S4

*Real time PCR primer sequences used*

| <b>Gene</b>                      | <b>Forward</b>                       | <b>Reverse</b>                         |
|----------------------------------|--------------------------------------|----------------------------------------|
| <i>SOCS1</i>                     | GCT GTG CCG CAG CAT TAA G            | CCA GAA GTG GGA GGC ATC TC             |
| <i>SOCS3</i>                     | TTC CCA TGC CGC TCA CA               | CCC ACC CAG CCC CAT AC                 |
| <i>IFN-<math>\gamma</math></i>   | GCT TTG CAG CTC TTC CTC AT           | CAC ATC TAT GCC ACT TGA GTT AAA ATA GT |
| <i>IFN-<math>\beta</math></i>    | CTG GAG CAG CTG AAT GGA AAG          | TCC GTC ATC TCC ATA GGG ATCT           |
| <i>IFN-<math>\alpha</math>4</i>  | TCT GAT GCA GCA GGT GGG              | AGG GCT CTC CAG AYT TCT GCT CTG        |
| <i>IL-12p40</i>                  | CGT GCT CAT GGC TGG TGC AAA<br>G     | CTT CAT CTG CAA GTT CTT GGG C          |
| <i>IL-12p35</i>                  | AGT TTG GCC AGG GTC ATT CC           | TCT CTG GCC GTC TTC ACC AT             |
| <i>IL-12R<math>\beta</math>1</i> | TGC CTG TGT GTG TTC CAC CT           | TCC TTG CAT GGT TAG ACG CC             |
| <i>IL-12R<math>\beta</math>2</i> | GCA TCA GTG TCT GCA GCC AA           | GAG ACC TGG TGA GGA GCC AG             |
| <i>IL-1<math>\beta</math></i>    | TGG TGT GTG ACG TTC CCA TT           | CAG CAC GAG GCT TTT TTG TTG            |
| <i>IL-6</i>                      | ACA AGT CGG AGG CTT AAT TAC<br>ACA T | TTG CCA TTG CAC AAC TCT TTT C          |
| <i>TNF-<math>\alpha</math></i>   | GGC TGC CCC GAC TAC GT               | GAC TTT CTC CTG GTA TGA GAT AGC AAA    |
| <i>iNOS</i>                      | CAG CTG GGC TGT ACA AAC CTT          | CAT TGG AAG TGA AGC GTT TCG            |
| <i>CXCL9</i>                     | CTT TTC CTC TTG GGC ATC AT           | GCA TCG TGC ATT CCT TAT CA             |
| <i>CXCL10</i>                    | GCT GCC GTC ATT TTC TGC              | TCT CAC TGG CCC GTC ATC                |
| <i>CXCL1</i>                     | GGC GCC TAT CGC CAA TG               | CTG GAT GTT CTT GAG GTG AAT CC         |
| <i>CXCL2</i>                     | CCC CCT GGT TCA GAA AAT CA           | GGT TCT TCC GTT GAG GGA C              |
| <i>HPRT</i>                      | CCC AGC GTC GTG ATT AGC              | GGA ATA AAC ACT TTT TCC AAA TCC        |
